# Supplementary material for: Horse owners’ knowledge, and opinions on recognising colic in the horse
Source: PubMed Central journal article supplement (PMC7027804; doi:10.1111/evj.13173), 2019-09-23
Supplement: EVJ-52-262-s004.pdf [file EVJ-52-262-s004.pdf]

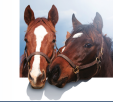

**Supplementary Item 4:** Horse owner's opinions (n = 1,552) of how they would react to specific, isolated changes in and behaviour in their horse in an online survey of horse owners' knowledge and understanding of colic.

This table provides the detail of the data for the questions on how owners would respond to changes in their horse's behaviour, specifically whether they would monitor/observe or call the veterinarian.

| Behavioural changes                                                        | Number of respondents | Monitor or observe horse | Call a veterinary surgeon | Alternative response | Decision significantly associated with                                                |
|----------------------------------------------------------------------------|-----------------------|--------------------------|---------------------------|----------------------|---------------------------------------------------------------------------------------|
| <b>Quiet/depressed</b>                                                     | 1,543                 | 83% (n = 1,280)          | 12% (n = 178)             | 5% (n = 85)          |                                                                                       |
| <b>Fence/Box walking</b>                                                   | 1,544                 | 79% (n = 1,220)          | 8% (n = 127)              | 13% (n = 197)        | Age of the owner (p<0.01) or experience of a colic case in the previous year (p<0.01) |
| <b>Weight shifting from one foot to another</b>                            | 1,546                 | 70% (n = 1,075)          | 16% (n = 241)             | 24% (n = 230)        |                                                                                       |
| <b>Pawing at floor (not in response to food or other stimulus)</b>         | 1,538                 | 59% (n = 914)            | 31% (n = 484)             | 10% (n = 140)        | Previous experience of a critical case (p = 0.025)                                    |
| <b>Rolling &gt;5 minutes or multiple times (4+) in 30 minutes</b>          | 1,552                 | 6% (n = 99)              | 90% (n = 1,390)           | 4% (n = 63)          | If owner had qualifications of college level or higher (p = 0.048)                    |
| <b>Restlessly lying down and getting up (4+ times in 30 minute period)</b> | 1,548                 | 9% (n = 134)             | 88% (1,358)               | 3% (n = 56)          |                                                                                       |

|                                                                     |       |               |                 |              |                                                    |
|---------------------------------------------------------------------|-------|---------------|-----------------|--------------|----------------------------------------------------|
| <b>Lying down and getting up (2-3 times in 30 minutes)</b>          | 1,546 | 29% (n = 451) | 65% (n = 1,002) | 6% (n = 93)  | Previous experience of a critical case (p = 0.043) |
| <b>Kicking at abdomen (no obvious external stimulus e.g. flies)</b> | 1,546 | 30% (n = 467) | 65% (n = 999)   | 5% (n = 80)  |                                                    |
| <b>Flank watching</b>                                               | 1,547 | 45% (n = 689) | 50% (n = 770)   | 5% (n = 88)  |                                                    |
| <b>Inappetant</b>                                                   | 1,547 | 51% (n = 789) | 42% (n = 648)   | 7% (n = 110) |                                                    |
