# Supplementary material for: Horse owners’ knowledge, and opinions on recognising colic in the horse
Source: PubMed Central journal article supplement (PMC7027804; doi:10.1111/evj.13173), 2019-09-23
Supplement: EVJ-52-262-s006.pdf [file EVJ-52-262-s006.pdf]

**Supplementary Item 6:** Areas where information is lacking on colic in the horse, identified by horse owners (n = 940) in their horse in an online survey of horse owners' knowledge and understanding of colic.

This supplementary item provides a list of the areas which were nominated in free text responses by horse owners when asked where they thought information on colic was lacking.

| Areas identified by participants where information is thought to be lacking on colic in the horse |
|---------------------------------------------------------------------------------------------------|
| Presentation/recognition of colic                                                                 |
| Different types/causes of colic                                                                   |
| What to do whilst a horse is colicing                                                             |
| Prevention of colic                                                                               |
| Normal ranges and gut sounds                                                                      |
| When to call a vet                                                                                |
| Treatment of colic                                                                                |
| Early or subtle symptoms of colic                                                                 |
| All colic information                                                                             |
| Information on surgery for colic                                                                  |
